# Supplementary material for: Novel bluish green benzimidazole-based iridium(iii) complexes for highly efficient phosphorescent organic light-emitting diodes
Source: Royal Society of Chemistry journal article supplement (doi:10.1039/c6nj03634a), 2017-01-01
Supplement: c6nj03634a1.pdf [file c6nj03634a1.pdf]

## Supplementary Information

### **Novel bluish green benzimidazole-based iridium(III) complexes for highly efficient phosphorescent organic light-emitting diodes**

Jin-Hui Zhao<sup>a</sup>, Yong-Xu Hu<sup>a</sup>, Yan Dong<sup>a</sup>, Yan-Li Lü<sup>a</sup>, Hai-Jun Chi<sup>a</sup>, Guo-Yong Xiao<sup>a</sup>,  
Xiao Li<sup>a, \*</sup>, and Dong-Yu Zhang<sup>b, \*</sup>

<sup>a</sup>School of Chemical Engineering, University of Science and Technology Liaoning (USTL),  
Anshan 114051, People's Republic of China

<sup>b</sup>Suzhou Institute of Nano-Tech and Nano-Bionics (SINANO), Chinese Academy of Sciences,  
Suzhou 215123, People's Republic of China

\* Corresponding authors. E-mails: [xiaoli@ustl.edu.cn](mailto:xiaoli@ustl.edu.cn); (X. Li); [dyzhang666@yeah.net](mailto:dyzhang666@yeah.net) (D. Zhang).

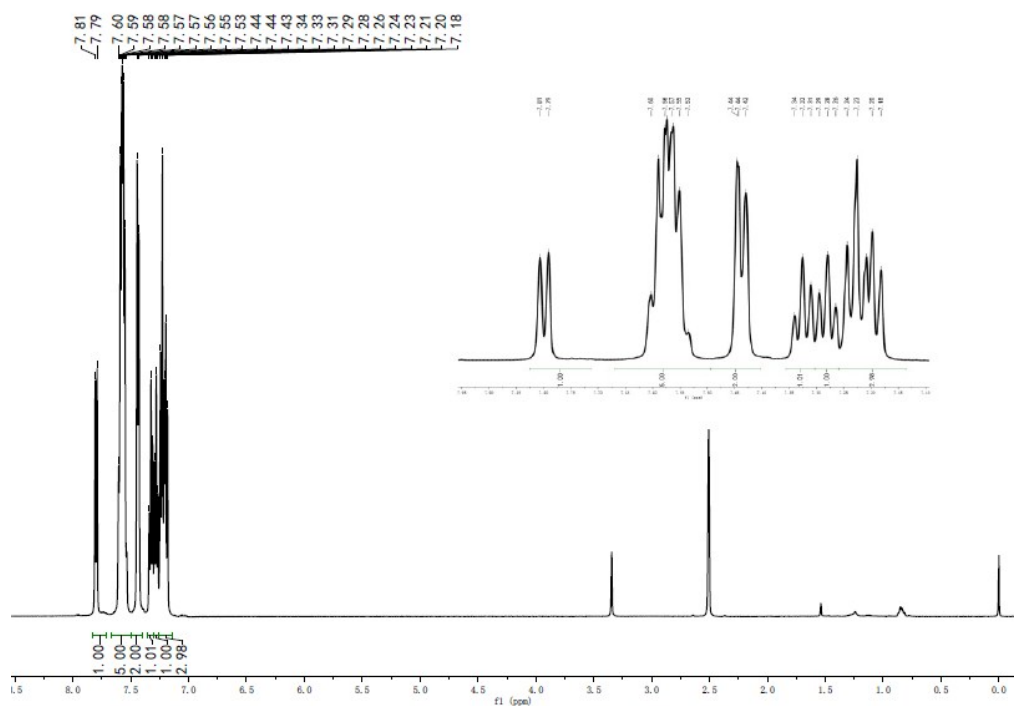

Figure S1 <sup>1</sup>H NMR of 1F ligand.

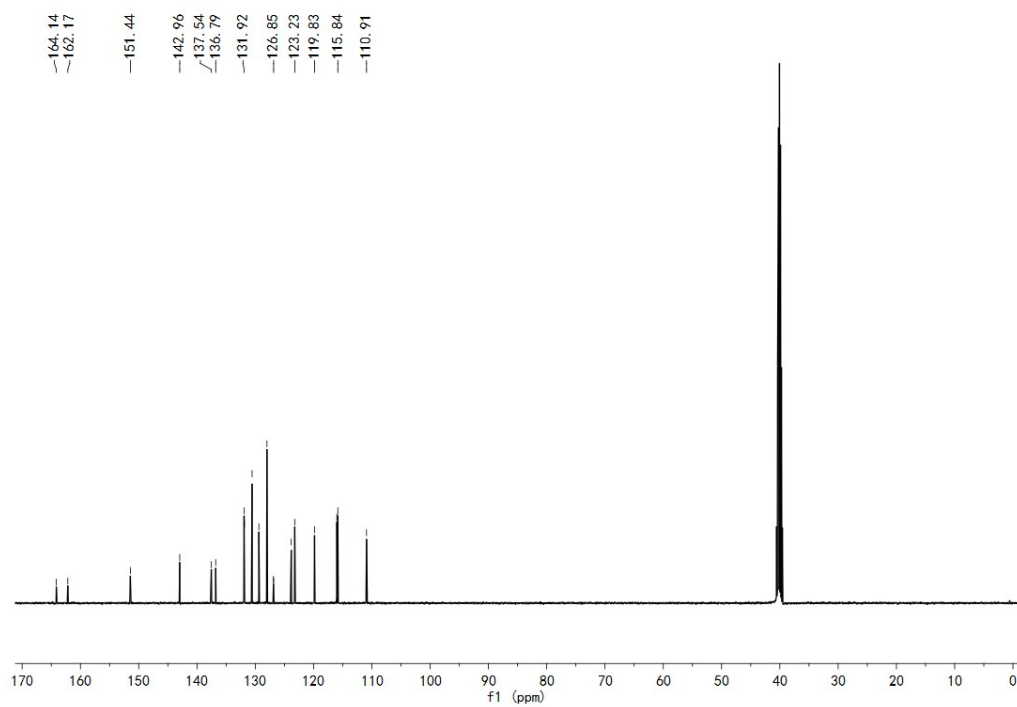

Figure S2 <sup>13</sup>C NMR of 1F ligand.

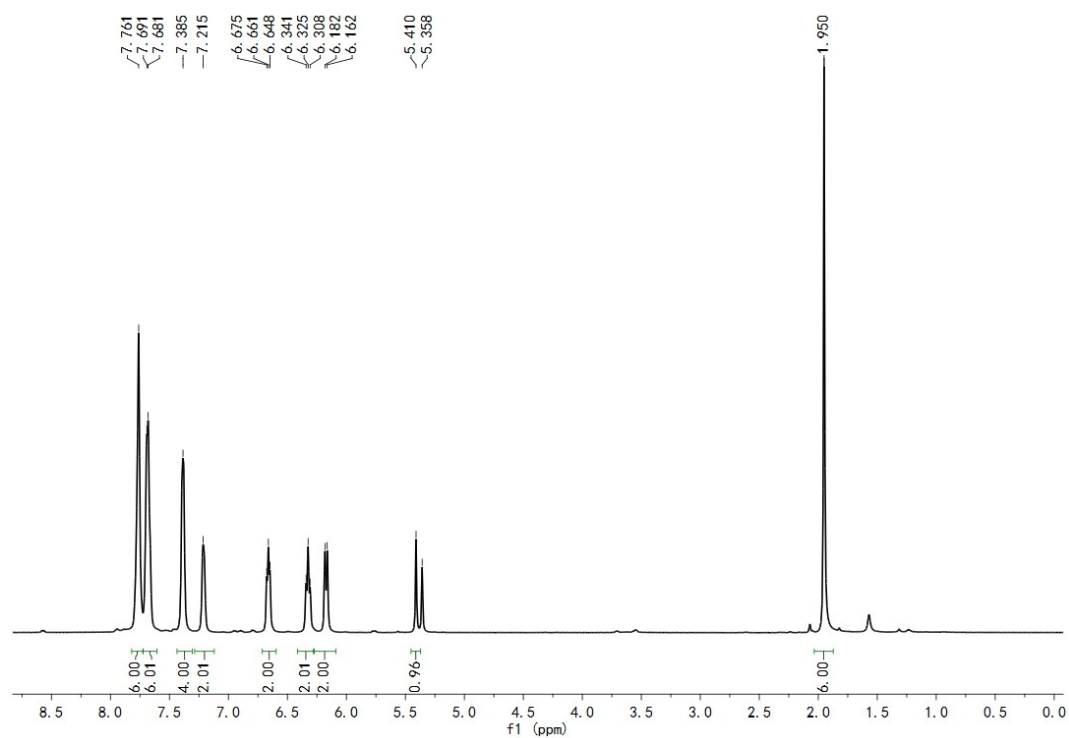

Figure S3  $^1\text{H}$  NMR of 1F-Ir.

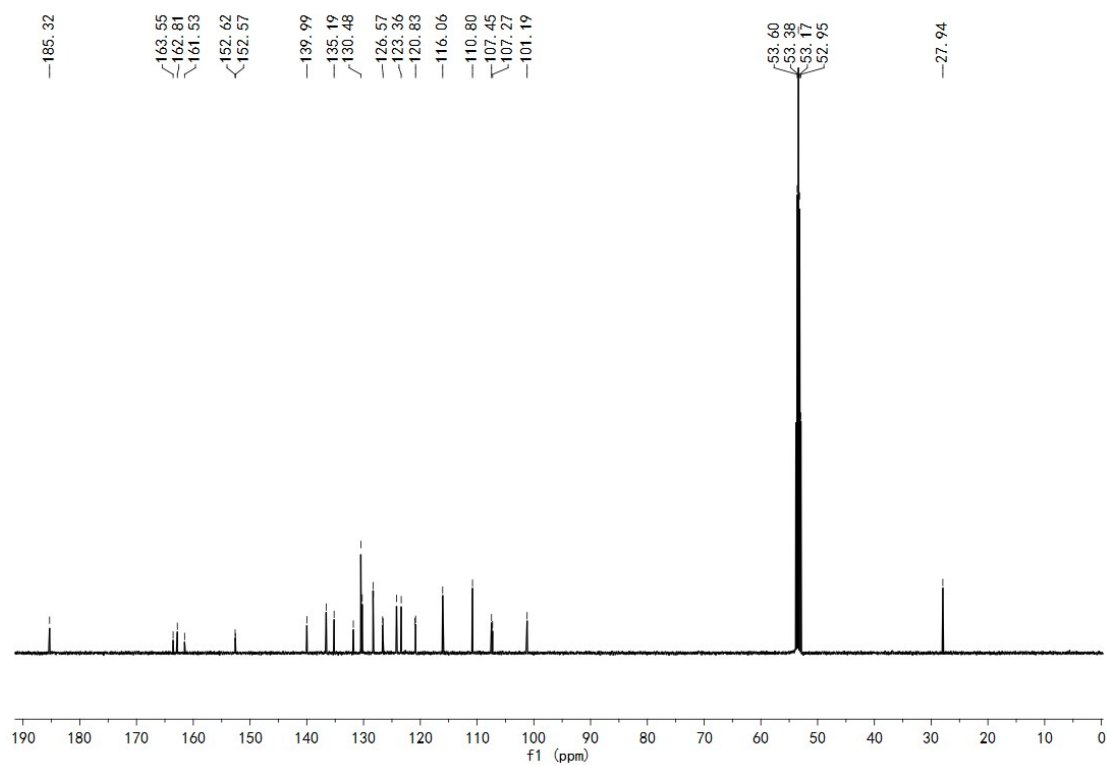

Figure S4  $^{13}\text{C}$  NMR of 1F-Ir.

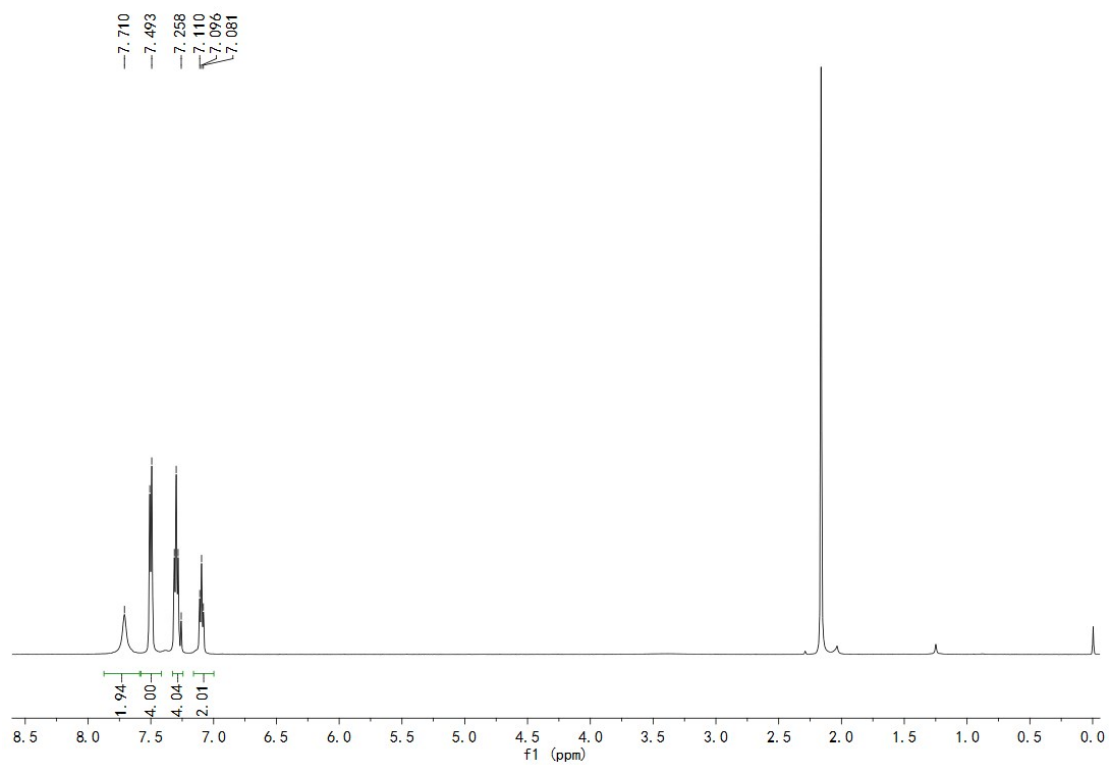

**Figure S5  $^1\text{H}$  NMR of 2F ligand.**

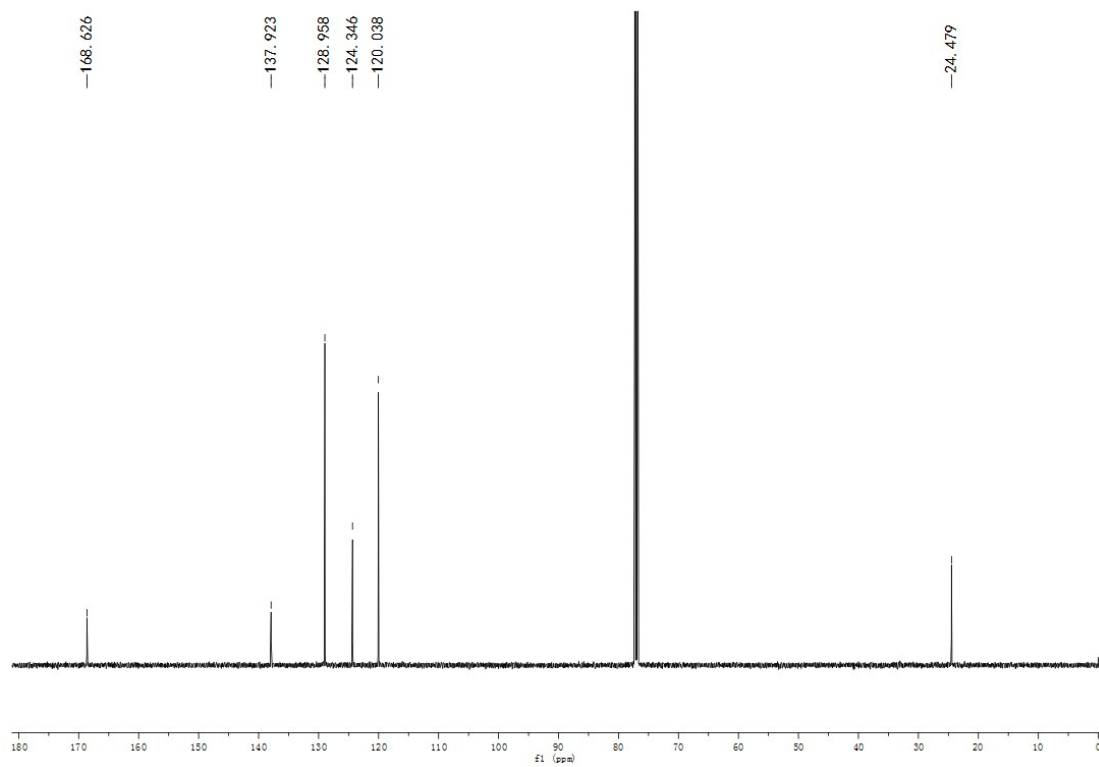

**Figure S6  $^{13}\text{C}$  NMR of 2F ligand.**

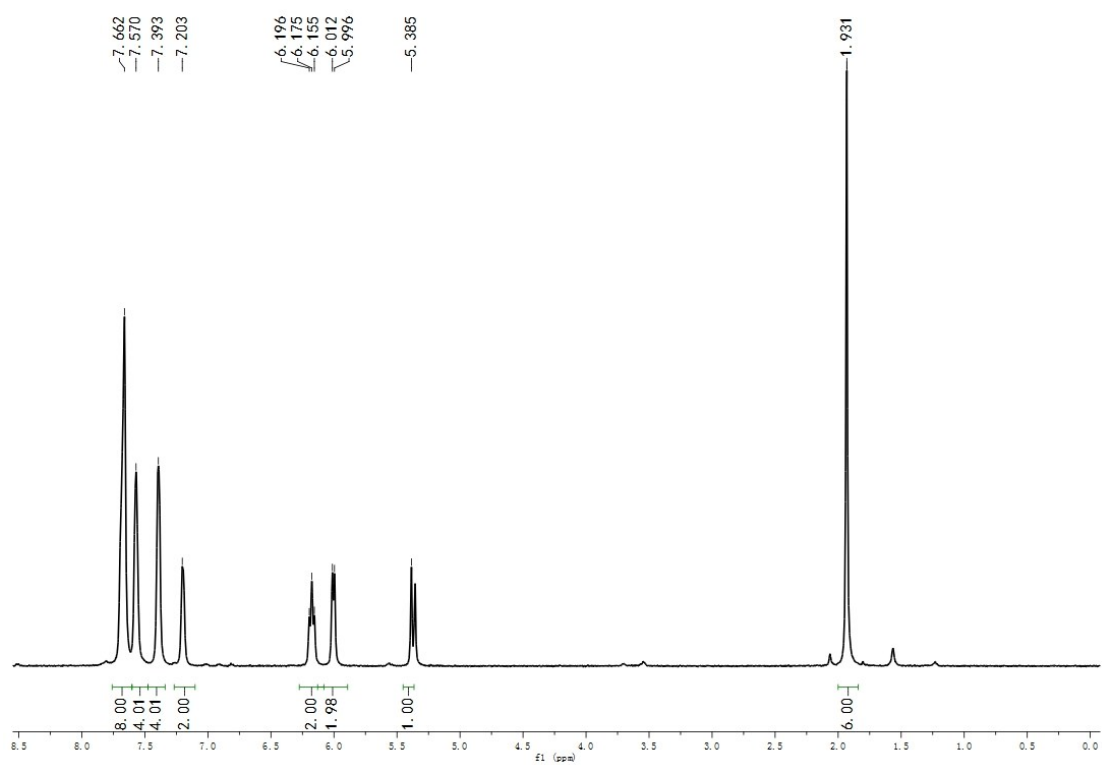

Figure S7  $^1\text{H}$  NMR of 2F-Ir.

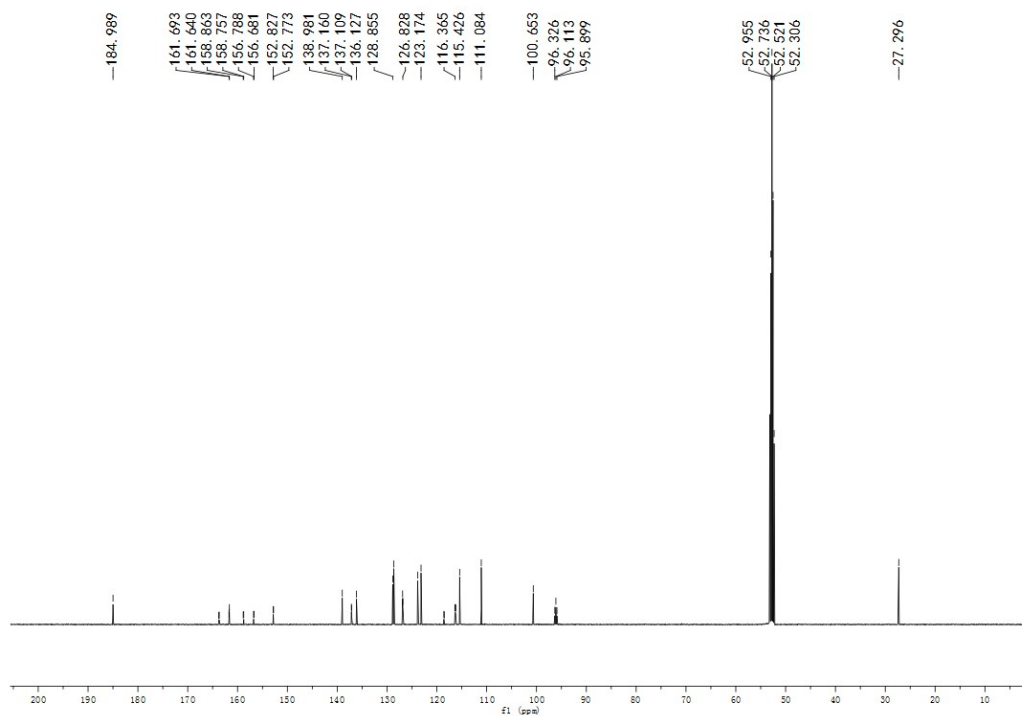

Figure S8  $^{13}\text{C}$  NMR of 2F-Ir.

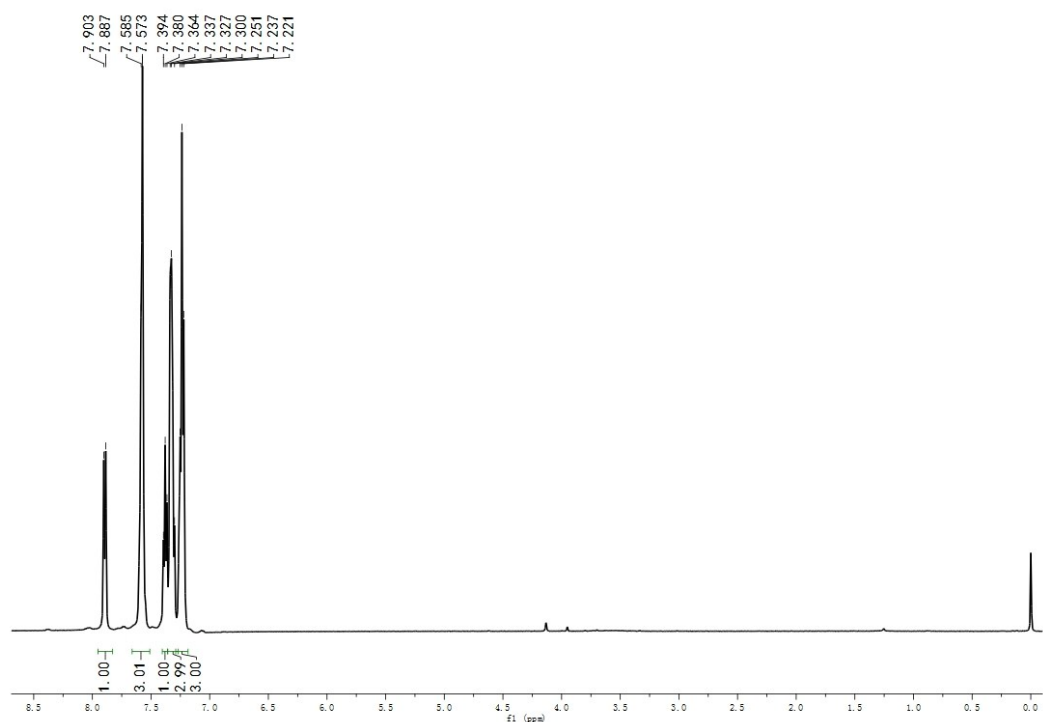

**Figure S9 <sup>1</sup>H NMR of 3F ligand.**

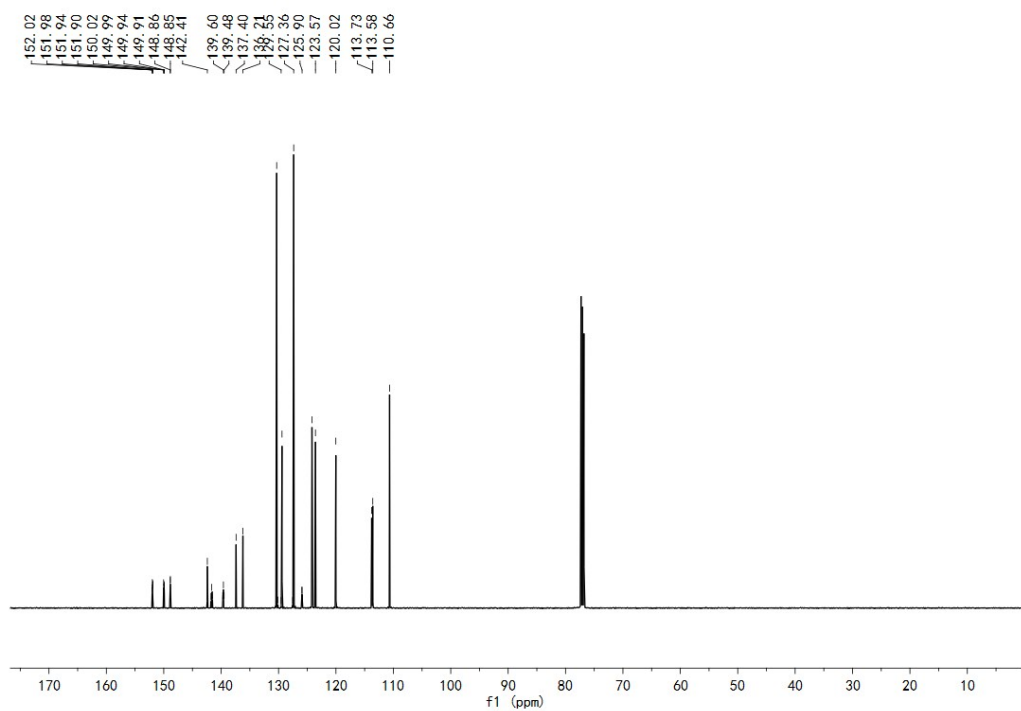

**Figure S10 <sup>13</sup>C NMR of 3F ligand.**

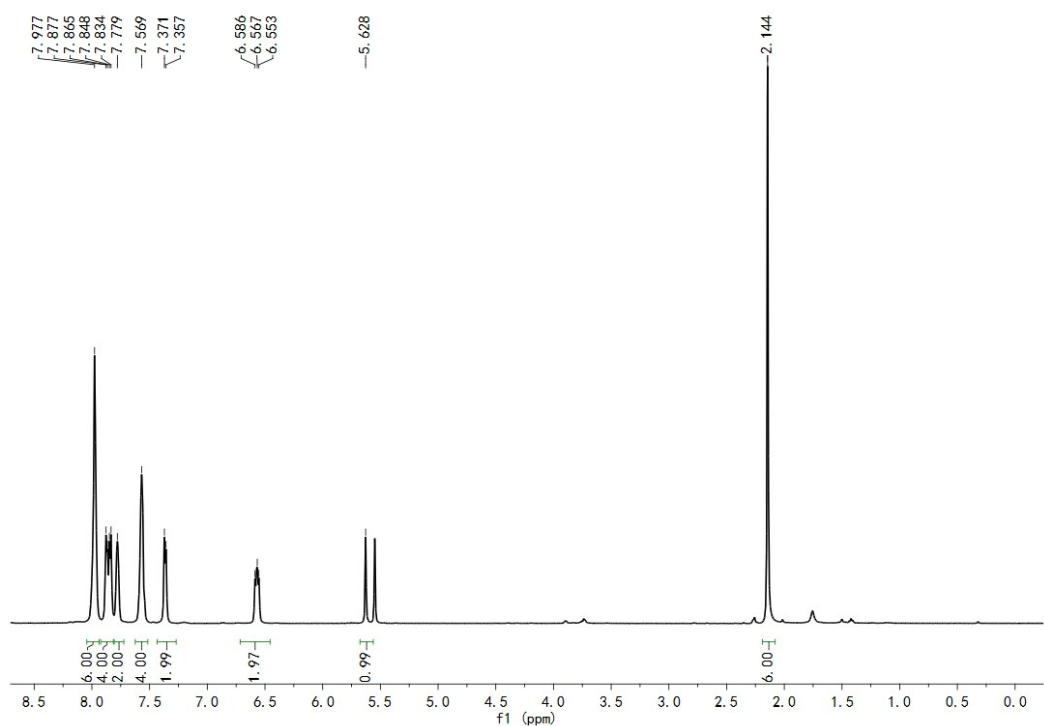

Figure S11 <sup>1</sup>H NMR of 3F-Ir.

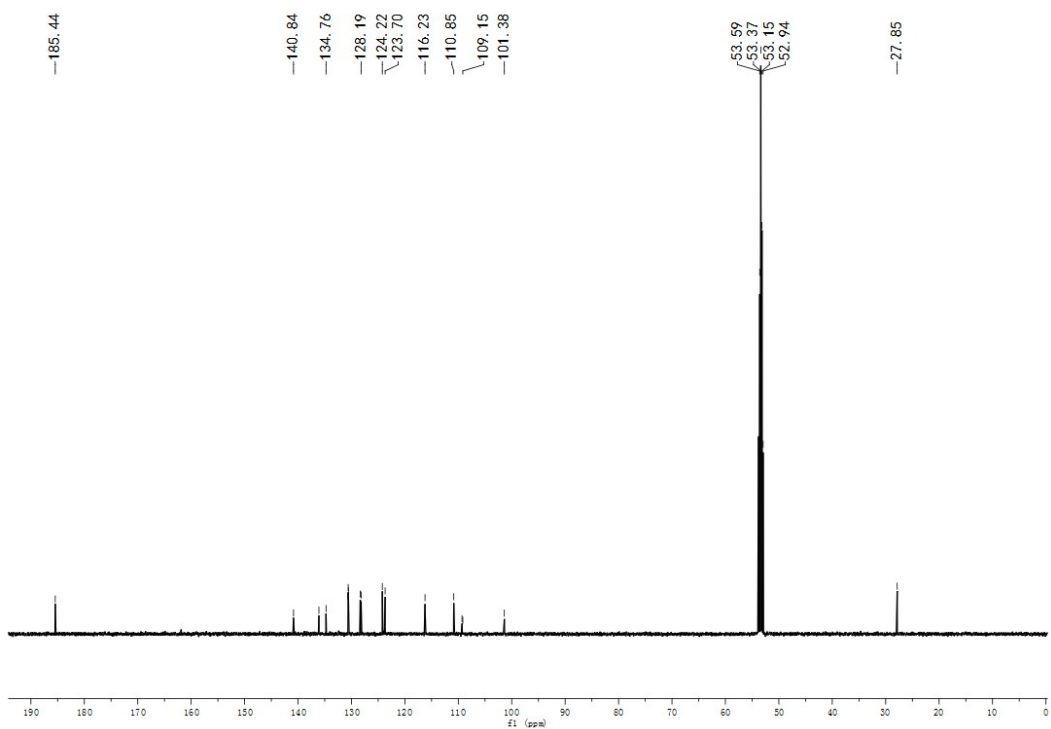

Figure S12 <sup>13</sup>C NMR of 3F-Ir.

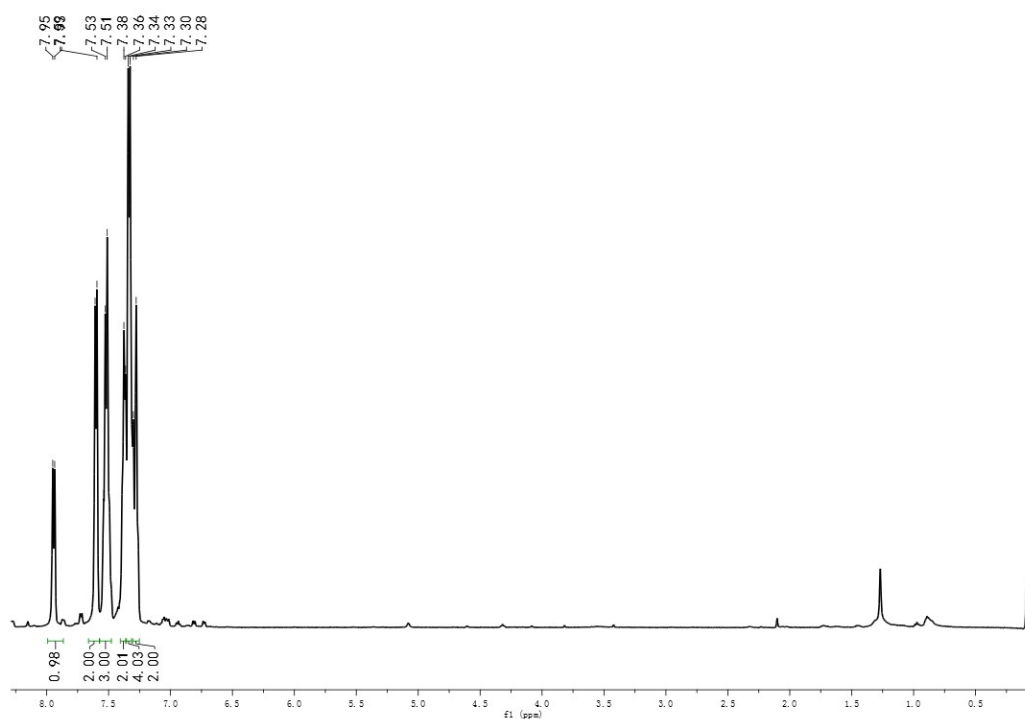

**Figure S13  $^1\text{H}$  NMR of 0F ligand.**

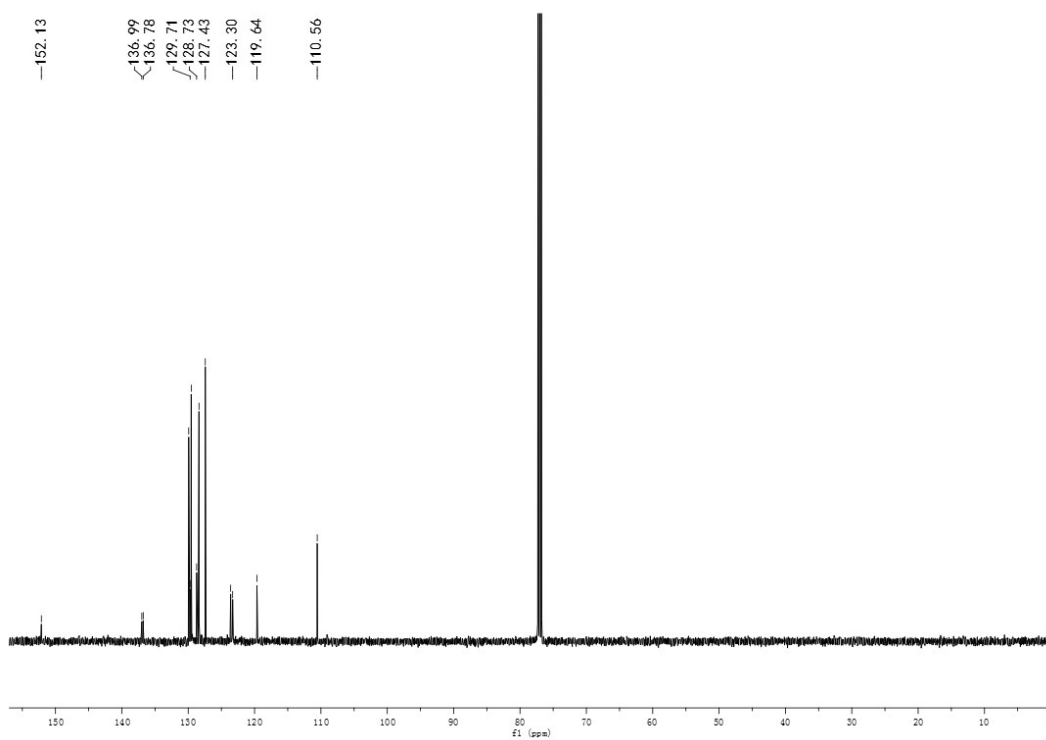

**Figure S14  $^{13}\text{C}$  NMR of 0F ligand.**



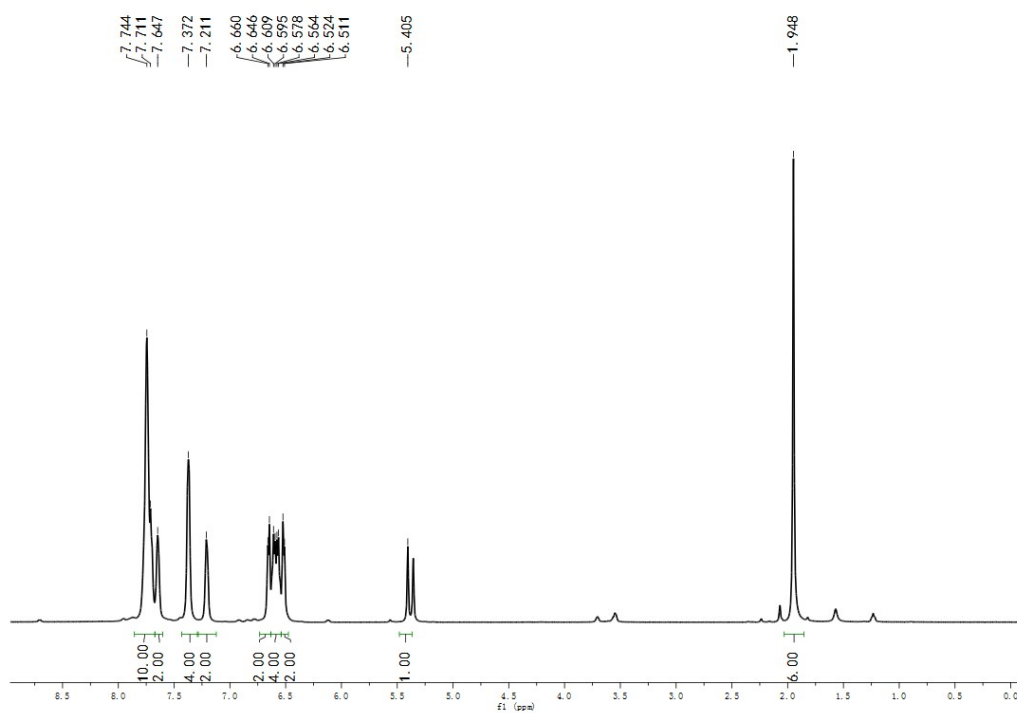

**Figure S15 <sup>1</sup>H NMR of 0F-Ir.**

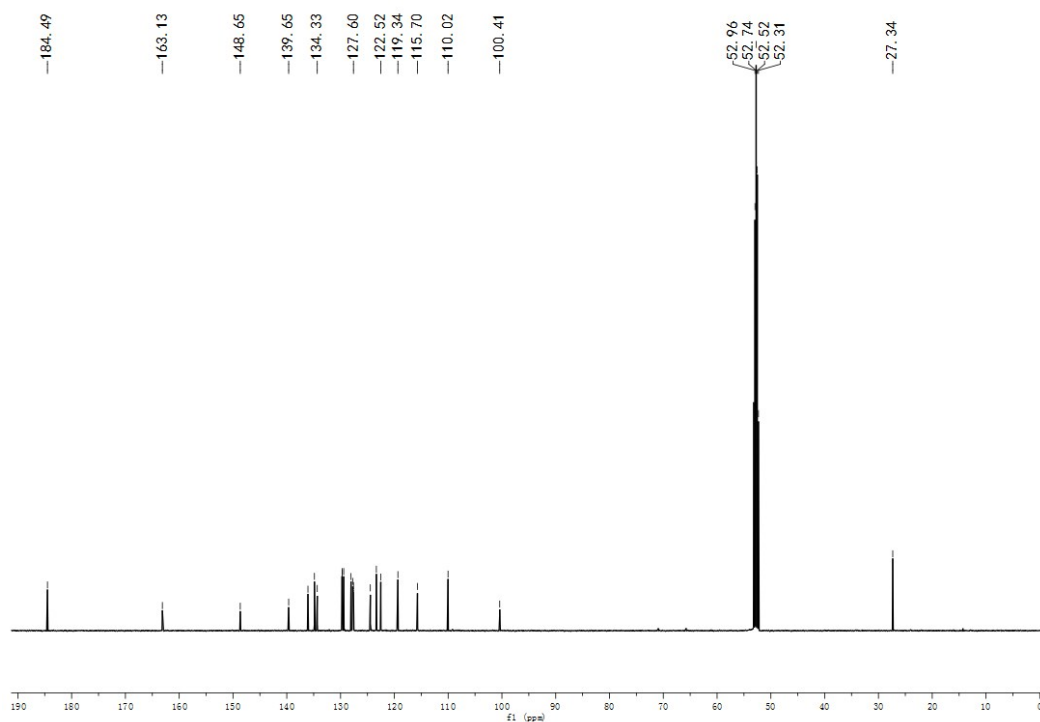

**Figure S16 <sup>13</sup>C NMR of 0F-Ir.**
